# Supplementary material for: Synergistic Antimicrobial Effect of Cold Atmospheric Plasma and Redox-Active Nanoparticles
Source: MDPI journal article supplement (doi:10.3390/biomedicines11102780), 2023-10-13
Supplement: s1 [file s1]

## Supplementary data

# Synergistic antimicrobial effect of cold atmospheric plasma and redox-active nanoparticles

Artem M. Ermakov<sup>1,2,3</sup>, Vera A. Afanasyeva<sup>1,2</sup>, Alexander V. Lazukin<sup>4</sup>, Yuri M. Shlyapnikov<sup>2</sup>, Elizaveta S. Zhdanova<sup>1,2</sup>, Anastasia A. Kolotova A.A.<sup>2</sup>, Artem S. Blagodatski A.S.<sup>2</sup>, Olga N. Ermakova O.N.<sup>2</sup>, Nikita N. Chukavin<sup>2,5</sup>, Vladimir K. Ivanov<sup>6</sup>, Anton L. Popov<sup>2,5</sup>

<sup>1</sup> Hospital of the Pushchino Scientific Center of the Russian Academy of Sciences, 142290 Pushchino, Moscow Region, Russia; beoluchi@yandex.ru (A.M.E.)

<sup>2</sup> Institute of Theoretical and Experimental Biophysics of the Russian Academy of Sciences, 142290 Pushchino, Moscow Region, Russia; va\_vera\_afanaseva@mail.ru (V.A.A.), yuri.shlyapnikov@gmail.com (Y.M.S.), dla\_lisa@mail.ru (E.S.Z.), anas.kolotowa2010@ya.ru (A.A.K.), bswin2000@gmail.com (A.S.B.), beoluchi@yandex.ru (O.N.E.), chukavinnik@gmail.com (N. N. C.), antonpopovleonid@gmail.com (A.L.P.)

<sup>3</sup> ANO Engineering Physics Institute, 142210 Serpukhov, Moscow Region, Russia; beoluchi@yandex.ru (A.M.E.)

<sup>4</sup> Troitsk Institute of Innovative and Thermonuclear Research (JSC «SSC RF TRINITY»), 108840, Moscow, Troitsk, Russia; lazukin@triniti.ru (A.V.L.)

<sup>5</sup> The State University of Education, Moscow 141014, Russia; chukavinnik@gmail.com (N. N. C.), antonpopovleonid@gmail.com (A.L.P.)

<sup>6</sup> Kurnakov Institute of General and Inorganic Chemistry, Russian Academy of Sciences, 119991 Moscow, Russia; van@igic.ras.ru (V.K.I.)

\* Correspondence: e-mail: antonpopovleonid@gmail.com (A.L.P.)

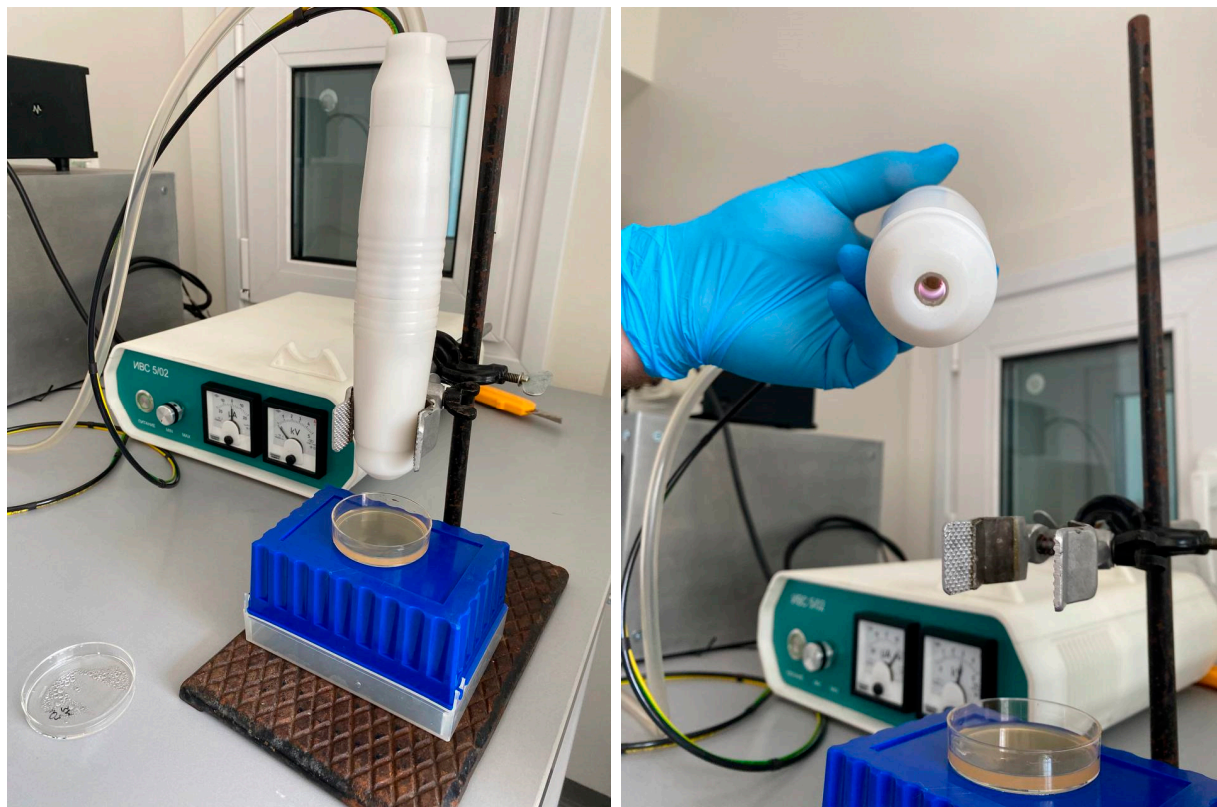

**Figure S1.** Irradiation scheme with the CAP irradiator (a) and demonstration of the nozzle with the outgoing plasma jet (b).

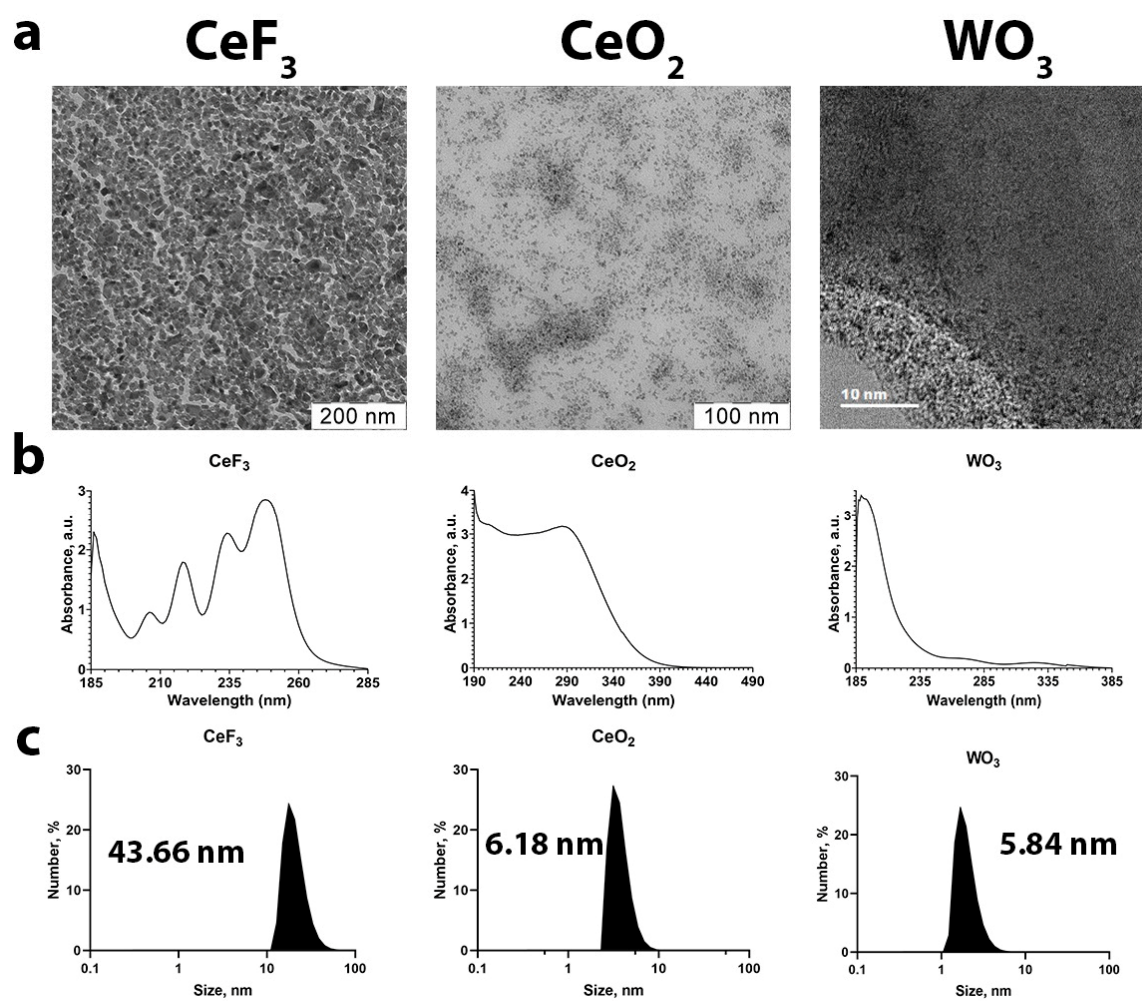

**Figure S2.** Characterisation of  $\text{CeF}_3$ ,  $\text{CeO}_2$  and  $\text{WO}_3$  nanoparticles: transmission electron microscopy (a), UV/visible spectra (b) and hydrodynamic diameters after dilution in distilled water (c).

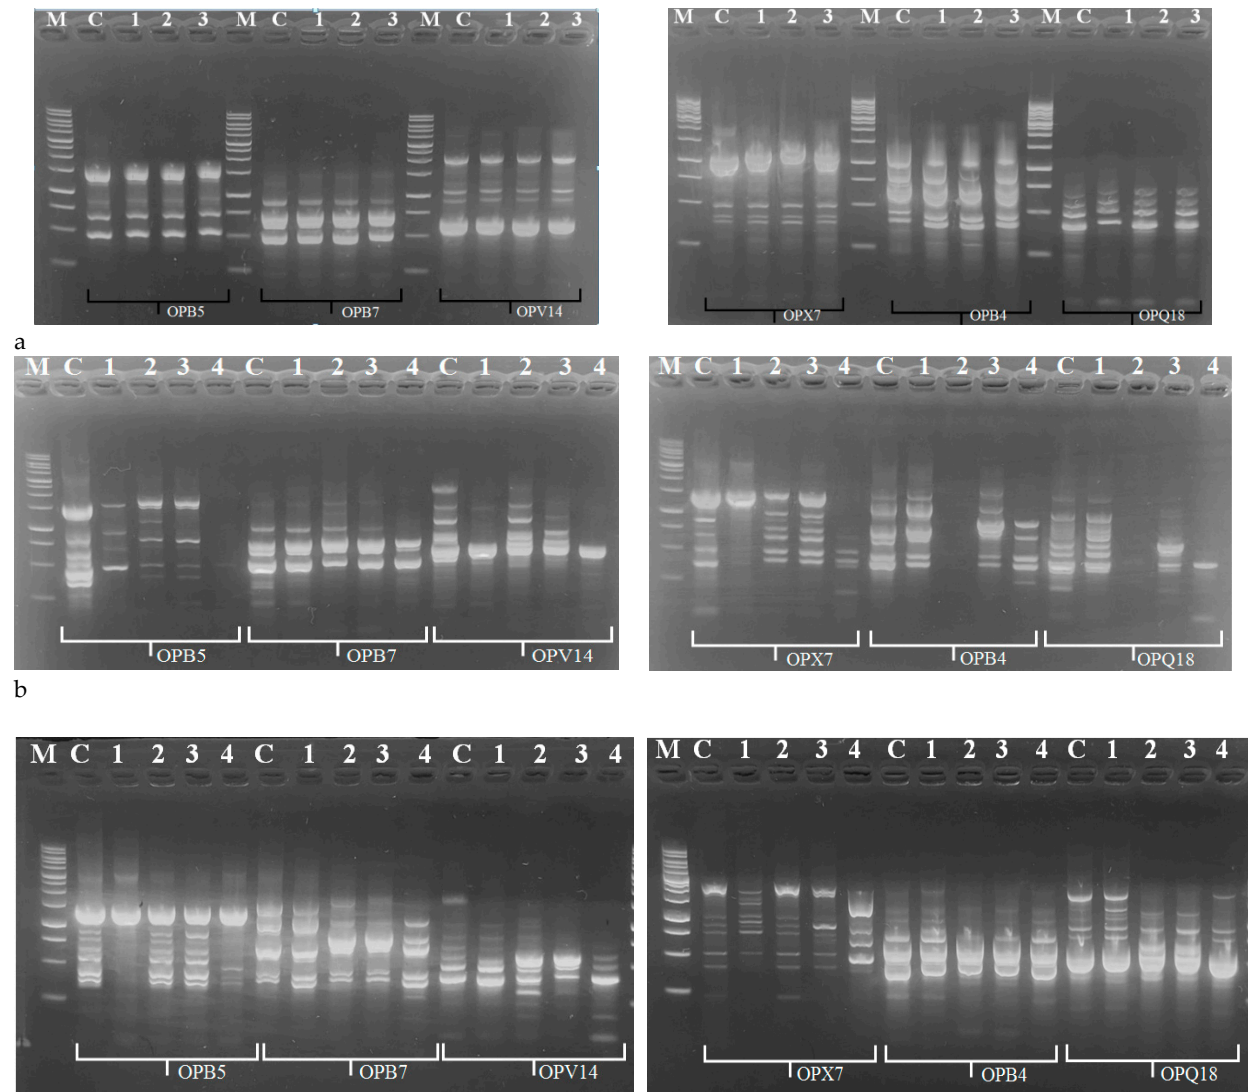

**Figure S3.** Results of RAPD PCR. a – samples treated with NPs, without CAP exposition. M – marker, C – control without NPs, 1-  $\text{CeO}_2$ , 2 -  $\text{CeF}_3$ , 3 -  $\text{WO}_3$ ; b – samples exposed to 3 min of CAP. M – marker, C – control, 1 – no NPs, 2 -  $\text{CeF}_3$ , 3 –  $\text{CeO}_2$ , 4 -  $\text{WO}_3$ ; c – samples exposed to 6 min of CAP. M – marker, C – control without NPs, 1 –no NPs, 2-  $\text{CeF}_3$ , 3 –  $\text{CeO}_2$ , 4 –  $\text{WO}_3$ .

a

|                               |                                  |                                   |
|-------------------------------|----------------------------------|-----------------------------------|
| Medium: water                 | Wavelength : 671 nm              | Reference intensity : 2916.3 kcps |
| Viscosity : 0.8936 mPa.s (cP) | Эффективное напряжение: 149.09 V | Stabilisation : 60 s              |
| RI: 1.33                      | Model : FFR                      | Number of Sub Runs: 10            |
| Dielectric constant : 78.5755 | Cuvette: capillary cuvette       |                                   |

## Results

 $\zeta$ - potential : 39.2262 mVElectrophoretic mobility : 3.0539  $\mu\text{mcm/Vs}$ 

Conductivity : 3.7864 mS/cm

Sample  $\text{CeF}_3$ 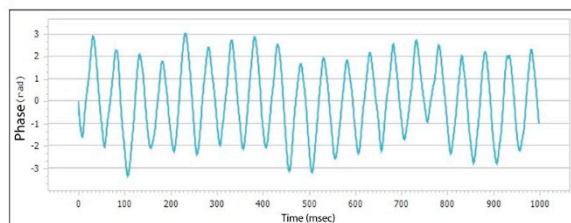

b

|                               |                             |                                 |
|-------------------------------|-----------------------------|---------------------------------|
| Medium: Water                 | Wavelength : 671 nm         | Reference intensity : 2932 kcps |
| Viscosity : 0.8936 mPa.s (cP) | Effective voltage : 48.81 V | Stabilisation : 60 s            |
| RI: 1.33                      | Model : FFR                 | Number of Sub Runs: 10          |
| Dielectric constant : 78.5755 | Cuvette: capillary cuvette  |                                 |

## Results

 $\zeta$ - potential : -28.7334 mVElectrophoretic mobility : -2.2370  $\mu\text{mcm/Vs}$ 

Conductivity : 6.4830 mS/cm

Sample  $\text{CeO}_2$ 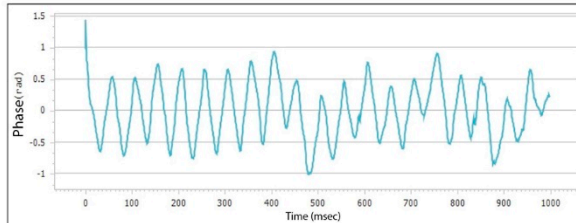

c

|                               |                              |                              |
|-------------------------------|------------------------------|------------------------------|
| Medium: water                 | Wavelength : 671 nm          | Reference intensity : 2848.1 |
| Viscosity : 0.8936 mPa.s (cP) | Effective voltage : 148.96 V | Stabilisation : 60 s         |
| RI: 1.33                      | Model : FFR                  | Number of Sub Runs: 10       |
| Dielectric constant : 78.5755 | Cuvette: capillary cuvette   |                              |

## Results

 $\zeta$ - potential : -8.1132 mVElectrophoretic mobility : -0.6316  $\mu\text{mcm/Vs}$ 

Conductivity : 2.6708 mS/cm

Sample  $\text{WO}_3$ 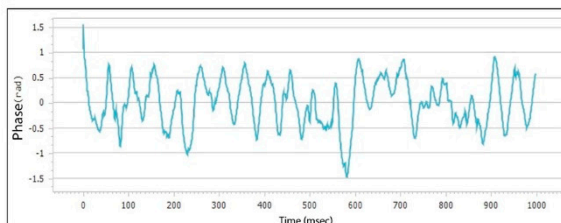

**Figure S4.** Zeta-potential values of the nanoparticles in distilled water:  $\text{CeF}_3$  (a),  $\text{CeO}_2$  (b),  $\text{WO}_3$  (c).
